# Supplementary material for: Metal triggered fluorescence sensing of citrate using a synthetic receptor
Source: Royal Society of Chemistry journal article supplement (doi:10.1039/b008694k), 2001-01-01

**Supplementary data**

**Metal Triggered Fluorescence Sensing of Citrate Using a Synthetic Receptor**

**Larry A. Cabell, Michael D. Best, John J. Lavigne, Stephen E. Schneider, Denise M. Perreault, Mary-Katherine Monahan and Eric V. Anslyn***

*The Department of Chemistry and Biochemistry, The University of Texas at Austin, Austin, USA, TX 78712*

Rose and Drago have derived a general equation for the determination of equilibrium constants from absorption spectrophotometric data, which does not contain an **L** term. For their derivation of this equation, L has been replaced by **Lt-A/****11** , and these values are substituted into Eq. (1) to give Eq. (2).

**A = [St]K11/11[L] (1)**

**b 1 + K11[L]**

**1 = A -St - Lt + StLt/11 (2)**

**K11 11 A**

The **A**, **St**, and **Lt** values can be determined from experimental conditions and absorbance readings. The 11 (difference in molar absorptivities) values are estimates of the actual 11value for the system within a reasonable range that are substituted into Eq. (2) to yield the corresponding **1/K11** values. A plot is made of 1/K11 versus **11**. This procedure is repeated for additional data points that are also plotted. The intersection of these plots corresponds to the actual 1/K11 and **11** values.

As stated, fluorimetry was our method to observe changes in the fluorescence intensity. At low concentrations, the fluorescence intensity is directly proportional to the fluorescence of the solution. Because of this direct proportionality, the quantitative treatment of fluorescent binding data can be processed in the same manner as absorption spectroscopy. Therefore we have modified the general Rose and Drago equation by deriving a new equation using fluorescence identities. This new equation has been used to determine association constants from our fluorescence data.

**1** = **F - Lt - St + (StLt) ki**

**Ka ki F**

Binding constants were determined using the above equation and the general procedure followed by Rose and Drago22. The **F**, **St**, and **Lt** values were determined from experimental conditions and fluorescence intensity observations. Where **F** is the difference between F observed and F initial, **St** is the total substrate concentration, and **Lt** is the total ligand concentration. The **ki** values were estimates of the actual **ki** value for the system within a reasonable range, which are substituted into Eq. (11) to yield the corresponding **1/K11** values. The **ki** value is the difference in proportionality constant values between **S** and **SL**. The **1/K11** values versus **ki** values were plotted. The **K11** value is binding constant between **S** and **L**. This procedure was repeated for additional data points, which are also plotted. The intersection of these plots corresponded to experimentally determined **1/K11** and **ki** values.


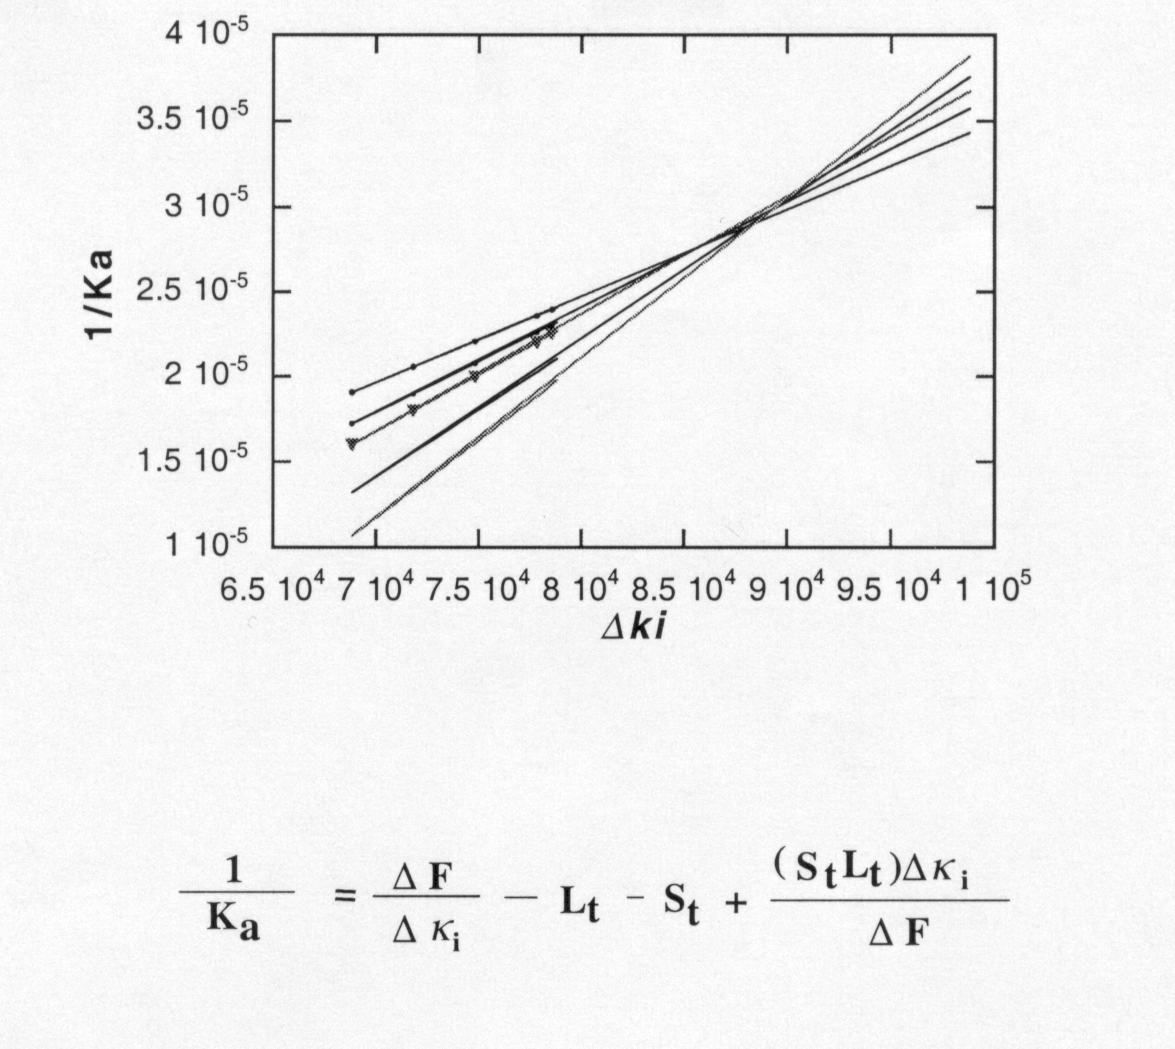

Supplement: b008694k.doc [file b008694k.doc]
